# Supplementary material
Source: PubMed Central journal article supplement (PMC4926831)
Supplement: mmc6.pdf [file mmc6.pdf]

**Supplement Table 5.** Biomechanical properties of femora.

|                    | AIN76A                  | AIN76A+AQ               | HFWD       | HFWD+AQ                   |
|--------------------|-------------------------|-------------------------|------------|---------------------------|
| <u>5 Months</u>    |                         |                         |            |                           |
| Yield load (N)     | 22.0 ± 2.8 <sup>c</sup> | 21.1 ± 2.9              | 16.8 ± 4.0 | 21.0 ± 3.0 <sup>a</sup>   |
| Max load (N)       | 29.0 ± 3.6              | 28.2 ± 2.4              | 27.7 ± 3.8 | 24.6 ± 2.6 <sup>b</sup>   |
| Stiffness (N/mm)   | 224 ± 20 <sup>c</sup>   | 215 ± 33                | 178 ± 34   | 218 ± 23 <sup>a</sup>     |
| Energy (Nmm)       | 4.8 ± 1.8 <sup>c</sup>  | 4.1 ± 2.2               | 9.1 ± 3.3  | 2.2 ± 0.9 <sup>a, b</sup> |
| Displacement ratio | 2.3 ± 0.6 <sup>c</sup>  | 2.3 ± 0.9               | 4.5 ± 1.6  | 1.6 ± 0.4 <sup>a, b</sup> |
| <u>12 Months</u>   |                         |                         |            |                           |
| Yield load (N)     | 21.3 ± 2.6              | 20.4 ± 3.2              | 19.6 ± 5.4 | 17.7 ± 4.6                |
| Max load (N)       | 25.2 ± 2.5 <sup>c</sup> | 28.4 ± 2.8 <sup>d</sup> | 35.2 ± 5.5 | 21.8 ± 5.7 <sup>a</sup>   |
| Stiffness (N/mm)   | 256 ± 25 <sup>c</sup>   | 247 ± 37                | 210 ± 36   | 213 ± 34 <sup>b</sup>     |
| Energy (Nmm)       | 1.9 ± 0.6 <sup>c</sup>  | 3.5 ± 1.4 <sup>d</sup>  | 12.0 ± 5.7 | 1.7 ± 1.1 <sup>a</sup>    |
| Displacement ratio | 1.6 ± 0.5 <sup>c</sup>  | 2.3 ± 0.6 <sup>d</sup>  | 4.6 ± 1.7  | 1.6 ± 0.8 <sup>a</sup>    |
| <u>18 Months</u>   |                         |                         |            |                           |
| Yield load (N)     | 18.3 ± 2.9              | 18.9 ± 3.8              | 15.7 ± 3.8 | 16.2 ± 2.4 <sup>b</sup>   |
| Max load (N)       | 23.5 ± 3.6 <sup>c</sup> | 27.1 ± 3.3 <sup>d</sup> | 27.5 ± 5.7 | 21.5 ± 2.6 <sup>a</sup>   |
| Stiffness (N/mm)   | 191 ± 22 <sup>c</sup>   | 212 ± 36                | 154 ± 43   | 166 ± 28 <sup>b</sup>     |
| Energy (Nmm)       | 2.7 ± 1.2 <sup>c</sup>  | 4.3 ± 2.1 <sup>d</sup>  | 6.9 ± 3.6  | 3.4 ± 2.7 <sup>a</sup>    |
| Displacement ratio | 1.9 ± 0.6 <sup>c</sup>  | 2.4 ± 0.9               | 3.7 ± 1.6  | 2.3 ± 1.2 <sup>a</sup>    |

Each femur was subjected to biomechanical testing. Long-bone mechanical properties were determined by loading the left femora to failure in 4-point bending. With each bone, 5 bone strength parameters were assessed. Values are means and standard deviations. Statistical significance was determined by ANOVA followed by paired group comparisons ( $p < 0.05$ ). “a” and “b” are placed on the HFWD+AQ group: “a” shows statistically significant difference relative to the HFWD group, “b” shows statistically significant difference relative to AIN76A; “c” is placed on the AIN76A shows significant difference relative to the HFWD and “d” is placed on the AIN76A+AQ shows significant difference relative to AIN76A. Data are based on 10 male mice in each diet group at 5 and 12 months while 15 mice at 18 months.
